# Supplementary material
Source: ML conference proceedings conference paper supplement (https://proceedings.neurips.cc/paper_files/paper/2008/hash/8f85517967795eeef66c225f7883bdcb-Abstract.html)
Supplement: Supplementary file [file 8f85517967795eeef66c225f7883bdcb-Supplemental.zip]

# Bayesian Kernel Shaping for Learning Control: Appendix

## The Complete Log Likelihood

The complete log likelihood  $L$  is:

$$\begin{aligned}
 L &= \log \left[ \prod_{i=1}^N \left[ p(y_i | \mathbf{z}_i, \sigma^2) p(\mathbf{z}_i | \mathbf{x}_i, \mathbf{b}, \psi_z) \right]^{w_i} \prod_{m=1}^d p(w_{im}) \right] \prod_{m=1}^d p(\mathbf{b}_m | \psi_{zm}) p(\psi_{zm}) p(h_m) p(\sigma^2) \\
 &= \sum_{i=1}^N \log p(y_i | \mathbf{z}_i, \sigma^2)^{w_i} + \sum_{i=1}^N \log p(\mathbf{z}_i | \mathbf{x}_i, \mathbf{b}, \psi_z)^{w_i} + \sum_{i=1}^N \sum_{m=1}^d \log p(w_{im}) + \sum_{m=1}^d \log p(h_m) \\
 &\quad + \sum_{m=1}^d \log p(\mathbf{b}_m | \psi_{zm}) + \sum_{m=1}^d \log p(\psi_{zm}) + \log p(\sigma^2) \tag{1}
 \end{aligned}$$

We can apply a variational approach on concave/convex functions in order to lower bound a problematic  $\log \left( 1 + (x_{im} - x_{qm})^{2r} h_m \right)$  term that prevents us from deriving an analytically tractable posterior distribution for  $h_m$ :

$$\begin{aligned}
 &\sum_{i=1}^N \sum_{m=1}^d \log p(w_{im}) \\
 &= \sum_{i=1}^N \sum_{m=1}^d w_{im} \log \left( \frac{1}{1 + (x_{im} - x_{qm})^{2r} h_m} \right) \\
 &\quad + \sum_{i=1}^N \sum_{m=1}^d (1 - w_{im}) \log \left( 1 - \frac{1}{1 + (x_{im} - x_{qm})^{2r} h_m} \right) \\
 &= \sum_{i=1}^N \sum_{m=1}^d w_{im} \log \left( \frac{1}{1 + (x_{im} - x_{qm})^{2r} h_m} \right) + \sum_{i=1}^N \sum_{m=1}^d (1 - w_{im}) \log \frac{(x_{im} - x_{qm})^{2r} h_m}{1 + (x_{im} - x_{qm})^{2r} h_m} \\
 &= \sum_{i=1}^N \sum_{m=1}^d (1 - w_{im}) \log (x_{im} - x_{qm})^{2r} h_m - \sum_{i=1}^N \sum_{m=1}^d \log \left( 1 + (x_{im} - x_{qm})^{2r} h_m \right) \\
 &\geq \sum_{i=1}^N \sum_{m=1}^d (1 - w_{im}) \log (x_{im} - x_{qm})^{2r} h_m - \sum_{i=1}^N \sum_{m=1}^d \lambda_{im} (x_{im} - x_{qm})^{2r} h_m \tag{2}
 \end{aligned}$$

where  $\lambda_{im}$  is a variational parameter to be optimized.

Incorporating the lower bound approximation in Eq. 2 into the expression for the complete log likelihood  $L$  in Eq. 1, the resulting lower bound to  $L$  is then  $\hat{L}$ :

$$\begin{aligned}
\hat{L} \geq & - \sum_{i=1}^N w_i \log 2\pi\sigma^2 - \sum_{i=1}^N \frac{w_i (y_i - \mathbf{1}^T \mathbf{z}_i)^2}{2\sigma^2} - \sum_{i=1}^N \sum_{m=1}^d w_i \log 2\pi\psi_{zm} \\
& - \sum_{i=1}^N \sum_{m=1}^d \frac{w_i (z_{im} - \mathbf{b}_m^T \mathbf{x}_{im})^2}{2\psi_{zm}} + \sum_{i=1}^N \sum_{m=1}^d (1 - w_{im}) \log (x_{im} - x_{qm})^{2r} h_m \\
& - \sum_{i=1}^N \sum_{m=1}^d \lambda_{im} (x_{im} - x_{qm})^{2r} h_m - \frac{1}{2} \sum_{m=1}^d \log |\Sigma_{\mathbf{b}_m, 0}| - \frac{1}{2} \sum_{m=1}^d \log \psi_{zm} \\
& - \sum_{m=1}^d \frac{\mathbf{b}_m^T \Sigma_{\mathbf{b}_m, 0}^{-1} \mathbf{b}_m}{2\psi_{zm}} - \sum_{m=1}^d \left( \frac{n_{m0}}{2} + 1 \right) \log \psi_{zm} - \sum_{m=1}^d \frac{n_{m0} \psi_{zm}^{n_{m0}}}{2\psi_{zm}} \\
& + \sum_{m=1}^d (a_{hm0} - 1) \log h_m - \sum_{m=1}^d b_{hm0} h_m + \text{const} \tag{3}
\end{aligned}$$

### Final Posterior EM Update Equations

**E-step:**

$$\Sigma_{\mathbf{b}_m} = \left( \Sigma_{\mathbf{b}_m, 0}^{-1} + \sum_{i=1}^N \langle w_i \rangle \mathbf{x}_{im} \mathbf{x}_{im}^T \right)^{-1} \tag{4}$$

$$\langle \mathbf{b}_m \rangle = \Sigma_{\mathbf{b}_m} \left( \sum_{i=1}^N \langle w_i \rangle \langle \mathbf{z}_{im} \rangle \mathbf{x}_{im} \right) \tag{5}$$

$$\Sigma_{\mathbf{z}_i | y_i, \mathbf{x}_i} = \frac{\Psi_{zN}}{\langle w_i \rangle} - \frac{1}{s_i} \left( \frac{\Psi_{zN}}{\langle w_i \rangle} \mathbf{1} \mathbf{1}^T \frac{\Psi_{zN}}{\langle w_i \rangle} \right) \tag{6}$$

$$\langle \mathbf{z}_i \rangle = \frac{\Psi_{zN}}{s_i \langle w_i \rangle} \mathbf{1} + \left( \mathbf{I}_{d,d} - \frac{\Psi_{zN}}{s_i \langle w_i \rangle} \mathbf{1} \mathbf{1}^T \right) \mathbf{b} \mathbf{x}_i \tag{7}$$

$$\psi_{zmN} = \frac{\left( \sum_{i=1}^N \langle w_i \rangle \left( \langle z_{im} \rangle - \langle \mathbf{b}_m \rangle^T \mathbf{x}_{im} \right)^2 + \sum_{i=1}^N \langle w_i \rangle \Sigma_{\mathbf{z}_i | y_i, \mathbf{x}_i} + n_{m0} \psi_{zmN0} \right)}{n_{m0} + \sum_{i=1}^N \langle w_i \rangle} \tag{8}$$

$$\langle w_{im} \rangle = \frac{q_{im} A_i \prod_{k=1, k \neq m}^d \langle w_{ik} \rangle}{q_{im} A_i \prod_{k=1, k \neq m}^d \langle w_{ik} \rangle + 1 - q_{im}} \tag{9}$$

$$\langle h_m \rangle = \frac{a_{hm0} + N - \sum_{i=1}^N \langle w_{im} \rangle}{b_{hm0} + \sum_{i=1}^N \lambda_{im} (x_{im} - x_{qm})^{2r}} \tag{10}$$

**M-step:**

$$\sigma^2 = \frac{1}{\sum_{i=1}^N \langle w_i \rangle} \sum_{i=1}^N \langle w_i (y_i - \mathbf{1}^T \mathbf{z}_i)^2 \rangle \tag{11}$$

$$\lambda_{im} = \frac{1}{1 + (x_{im} - x_{qm})^{2r} h_m} \tag{12}$$

where:

$$\begin{aligned}\langle w_i \rangle &= \prod_{m=1}^d \langle w_{im} \rangle \\ s_i &= \sigma^2 + \mathbf{1}^T \frac{\Psi_{zN}}{\langle w_i \rangle} \mathbf{1} \\ q_{im} &= \frac{1}{1 + (x_{im} - x_{qm})^{2r} \langle h_m \rangle} \\ A_i &= \text{Normal}(y_i; \mathbf{1}^T \langle \mathbf{z}_i \rangle, \sigma^2) \prod_{m=1}^d \text{Normal}(z_{im}; \langle \mathbf{b}_m \rangle^T \mathbf{x}_{im}, \psi_{zm})\end{aligned}$$

and  $\mathbf{I}_{d,d}$  is a  $d \times d$  identity matrix,  $\mathbf{b}\mathbf{x}_i$  is a  $d$  by 1 vector with coefficients  $\langle \mathbf{b}_m \rangle^T \mathbf{x}_{im}$ ,  $\Psi_{zN}$  is a diagonal matrix with  $\psi_{zN}$  on its diagonal,
